# Supplementary material
Source: publisher figshare collection journal article supplement (https://gsajournals.figshare.com/articles/dataset/_/7571978)
Supplement: Supplementary file 1 [file 1]

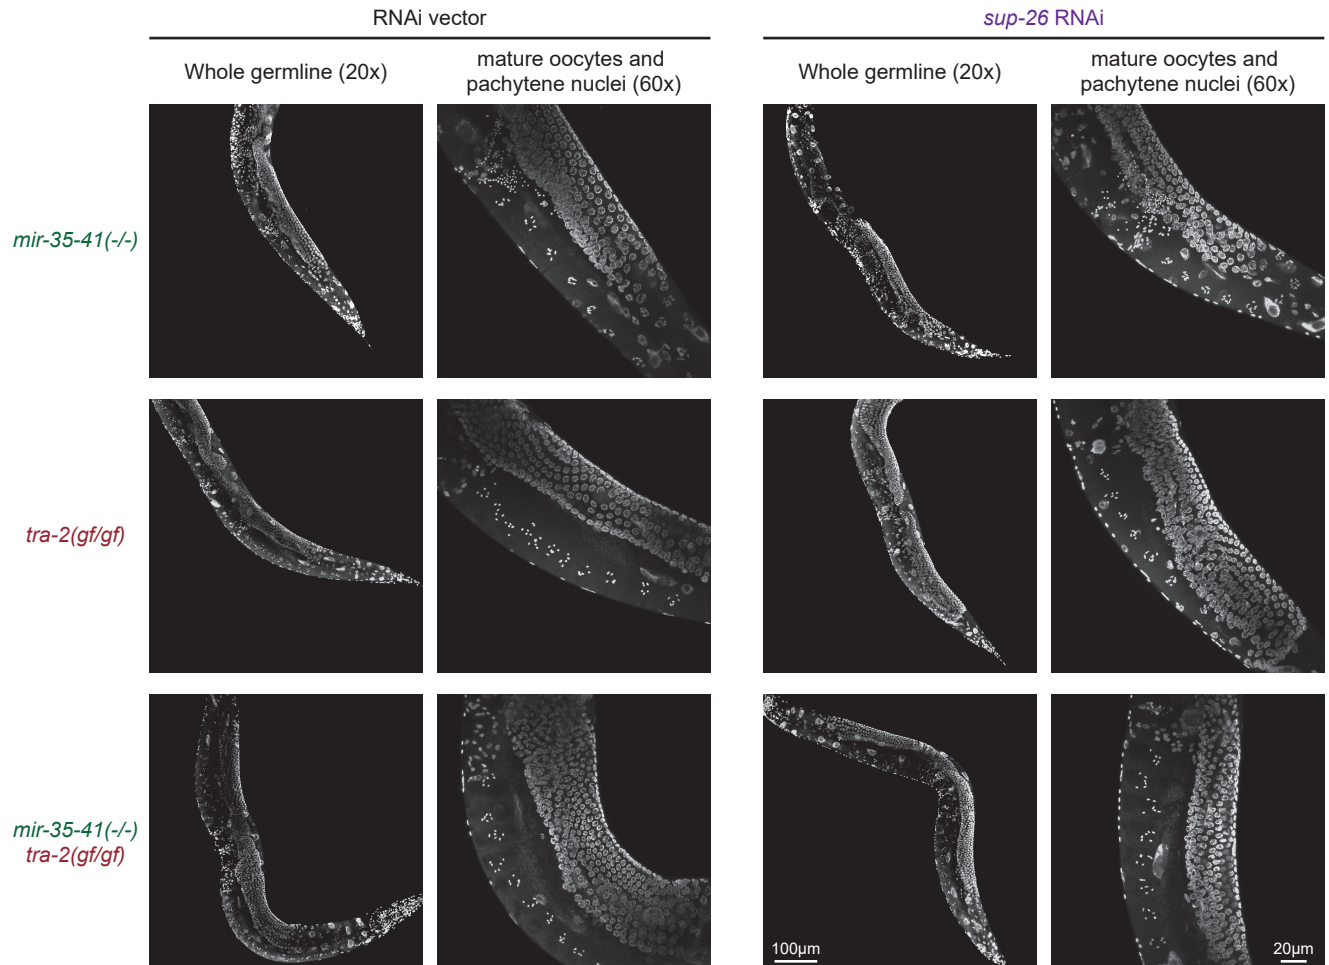

**Figure S1.** Germline development is grossly normal in *mir-35-41(nDf50)*, *tra-2(e2020gf)*, and *mir-35-41(nDf50) tra-2(e2020gf)* hermaphrodites or females. DAPI staining of first-day-gravid adults of indicated genotypes. RNAi treatment and genotypes are identical to mothers whose progeny are scored in Figure 2A. All genotypes show normal oocyte development.
