# Supplementary material
Source: publisher figshare collection journal article supplement (https://gsajournals.figshare.com/articles/dataset/_/7571978)
Supplement: Supplementary file 2 [file 1]

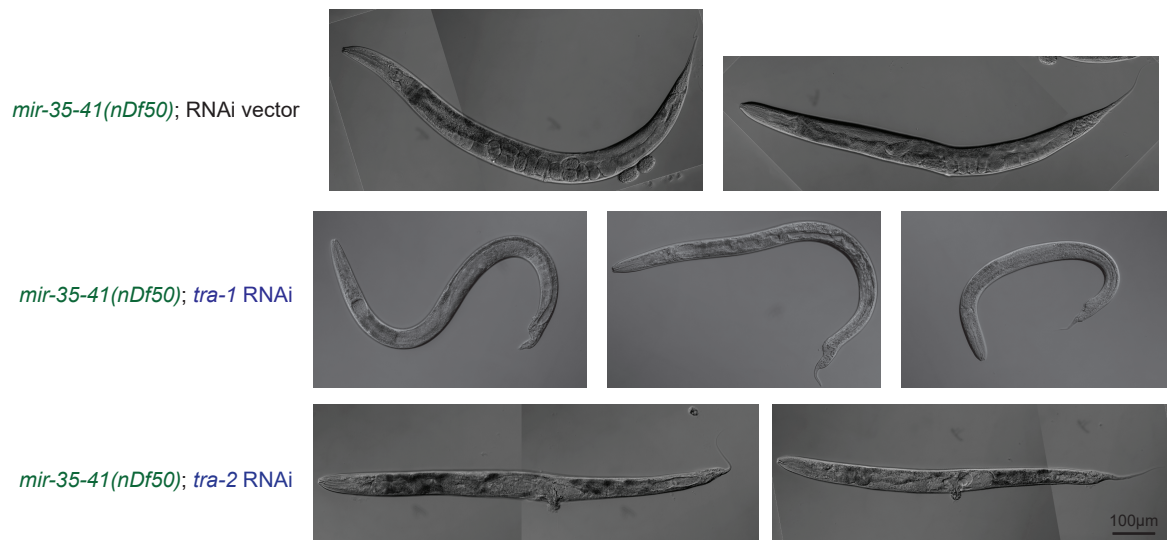

**Figure S2. RNAi against *tra-1* or *tra-2* elicits expected transformed and intersex phenotypes.** DIC micrographs of surviving animals quantified in Figure 2C.
